# Supplementary material
Source: Research Square preprint supplement (doi:10.21203/rs.3.rs-10216122/v1)
Supplement: Supplementary file 1 [file 6726f2c06d1cd4759b092ddc.docx]

**SUPPLEMENTARY MATERIAL**

*Parathyroid Hormone Suppression and Calcium Homeostasis Shift
in Type 2 Diabetes with Osteoporosis:
A Propensity Score-Matched Cross-Sectional Study*

────────────────────────────────────────────────────────────

**Contents**

S1. Detailed Statistical Methods

S1.1 Data Sources and Preprocessing

S1.2 Drug Review Protocol

S1.3 Propensity Score Matching

S1.4 Statistical Tests and Effect Sizes

S2. Supplementary Tables

Table S1. Baseline characteristics before PSM

Table S2. Bone metabolism markers by HbA1c strata (post-PSM)

Table S3. Spearman correlation: HbA1c vs. bone markers

Table S4. PTH distribution and subgroup analysis

S3. Sensitivity Analysis

Table S5. Impact of drug contamination on conclusions

S4. Analysis Code Availability

# S1. Detailed Statistical Methods

## S1.1 Data Sources and Preprocessing

Electronic health record (EHR) data were extracted from the inpatient database of Shanghai Changzheng Hospital covering the period January 2021 to August 2024. The following data tables were obtained from the hospital information system (HIS):

- (1) Inpatient demographic data: age, sex, admission/discharge dates, discharge department
- (2) Discharge diagnosis records: ICD-10 codes for T2DM (E11), osteoporosis (M80/M81), and bone metastasis
- (3) Laboratory test results: bone turnover markers (β-CTX, osteocalcin, 25(OH)VitD, PTH, calcium, phosphorus) and glycemic markers (HbA1c)
- (4) Medication order records: denosumab (60 mg and 120 mg), zoledronic acid, and other antiresorptive drugs

Laboratory data aggregation: When multiple test records existed for the same patient during the study period, the arithmetic mean of all available values was used as the representative value. Values reported with inequality symbols (e.g., "<0.05" or ">150") were treated as the reported limit value for computation.

## S1.2 Drug Review Protocol

A systematic medication review was performed to identify patients in the "DM without OP" group who received antiresorptive drugs for indications other than osteoporosis (e.g., bone metastases from malignancies). This step is critical because inclusion of such patients in the control group would artificially suppress bone turnover markers, biasing between-group comparisons. Three categories were identified and excluded:

- Category 1 — Denosumab 120 mg (Anjiawei®): n = 295 patients. This high-dose formulation is exclusively indicated for prevention of skeletal-related events in solid tumor patients with bone metastases.
- Category 2 — Zoledronic acid 4 mg: n = 197 patients. This dose is indicated for malignancy-related hypercalcemia and bone metastases (distinct from the 5 mg/once-yearly osteoporosis dose).
- Category 3 — Denosumab 60 mg (Prolia®) without OP diagnosis: n = 51 patients. Excluded to maintain control group purity.

After exclusions, 13,050 "Pure DM" patients with bone marker records were available as the control pool for PSM. A sensitivity analysis (Table S5) demonstrates that retaining these patients produces qualitatively opposite conclusions.

## S1.3 Propensity Score Matching (PSM)

**Propensity score estimation:** Logistic regression was fitted with group membership (DM+OP = 1, Pure DM = 0) as the dependent variable and two covariates: age (continuous, standardized by mean and SD) and sex (binary: male = 1, female = 0). The model was estimated via gradient descent (5,000 iterations, learning rate 0.01). Final coefficients: logit(P) = β₀ + β₁ × (age − mean)/SD + β₂ × sex.

**Matching algorithm:** Greedy nearest-neighbor matching without replacement, 1:3 ratio (each DM+OP patient matched to up to 3 Pure DM controls), with a caliper of 0.2 × SD of the propensity score. Result: 461 DM+OP patients matched to 1383 Pure DM controls (achieved ratio 3.0:1).

**Balance assessment:** Post-matching, age was identical between groups (69.3±8.8 vs 69.3±8.8 years) and sex distribution was identical (70(15.2%) vs 210(15.2%) male; SMD = 0.000 for both). SMD < 0.1 was considered indicative of adequate balance.

## S1.4 Statistical Tests and Effect Sizes

**Between-group comparisons:** Mann-Whitney U test was used for all continuous variable comparisons. Rank-biserial correlation (r = Z/√N) was reported as a standardized effect size (thresholds: r = 0.1 small, 0.3 medium, 0.5 large per Cohen 1988).

**Correlation analysis:** Spearman rank correlation (ρ) was used to assess associations between HbA1c and bone markers.

**HbA1c stratification:** Patients were stratified into: good glycemic control (HbA1c < 7%), moderate control (7–9%), and poor control (≥ 9%), consistent with ADA guidelines.

**Software:** All analyses were implemented in Python 3.x using standard libraries only (math, statistics, collections, openpyxl). Complete analysis scripts are provided as supplementary code files.

# S2. Supplementary Tables

## Table S1. Pre-matching baseline characteristics

Before PSM, the DM+OP group was significantly older (69.3 ± 8.8 vs 63.3 ± 12.0 years, p < 0.001) and had a substantially higher proportion of females (84.8% vs 64.4%, p < 0.001), necessitating age- and sex-based PSM.

| **Characteristic** | **DM+OP (n = 461)** | **Pure DM pool (n = 13,050)** | **SMD** | **p value** |
| --- | --- | --- | --- | --- |
| Age, years (mean ± SD) | 69.3 ± 8.8 | 63.3 ± 12.0 | 0.56 | < 0.001 |
| Female, n (%) | 391 (84.8%) | 8,404 (64.4%) | 0.50 | < 0.001 |
| HbA1c, % (median, IQR) | 7.7 (6.7–8.9) | 7.4 (6.7–8.6) | — | 0.075 |
| Bone marker availability | 461 / 461 (100%) | 13,050 / 21,724 (60.1%) | — | — |
| Osteoporosis treatment (denosumab 60 mg, bisphosphonates) | 461 (100%) | 0 (0%) | — | — |

*Note: SMD = standardized mean difference; SMD > 0.1 indicates meaningful imbalance. PSM was performed to equalize age and sex between groups.*

## Table S2. Bone metabolism markers by HbA1c strata in the PSM-matched cohort

Values are median (IQR). Between-group comparison (DM+OP vs Pure DM) within each HbA1c stratum. P-values by Mann-Whitney U test. Cohen's d as effect size.

| **Marker** | **Good glycemic control (HbA1c < 7%)** | | | **Moderate glycemic control (HbA1c 7–9%)** | | | **Poor glycemic control (HbA1c ≥ 9%)** | | |
| --- | --- | --- | --- | --- | --- | --- | --- | --- | --- |
|  | **DM+OP median (IQR)** | **Pure DM median (IQR)** | **p (d)** | **DM+OP median (IQR)** | **Pure DM median (IQR)** | **p (d)** | **DM+OP median (IQR)** | **Pure DM median (IQR)** | **p (d)** |
| β-CTX (ng/mL) | 0.4 (0.23-0.64) | 0.55 (0.4-0.68) | 0.047 * (d=-0.449) | 0.37 (0.22-0.54) | 0.35 (0.29-0.54) | 0.555 ns (d=-0.007) | 0.36 (0.23-0.55) | 0.33 (0.24-0.57) | 0.661 ns (d=0.079) |
| Osteocalcin (ng/mL) | 14.0 (10.0-20.9) | 14.75 (11.0-21.0) | 0.338 ns (d=-0.335) | 12.0 (8.0-16.2) | 11.0 (8.7-14.8) | 0.733 ns (d=0.094) | 11.0 (8.8-16.0) | 9.0 (7.0-13.0) | 0.023 * (d=0.508) |
| 25(OH)VitD (ng/mL) | 26.71 (21.97-31.73) | 22.59 (18.25-32.48) | 0.127 ns (d=0.330) | 24.34 (17.98-32.41) | 23.54 (18.89-30.41) | 0.868 ns (d=-0.050) | 23.28 (19.67-27.89) | 22.7 (17.99-29.95) | 0.579 ns (d=0.142) |
| Calcium (mmol/L) | 2.22 (2.14-2.31) | 2.23 (2.15-2.31) | 0.671 ns (d=0.062) | 2.22 (2.16-2.28) | 2.21 (2.15-2.29) | 0.477 ns (d=0.187) | 2.24 (2.2-2.3) | 2.23 (2.15-2.29) | 0.169 ns (d=0.262) |
| Phosphorus (mmol/L) | 1.19 (1.02-1.32) | 1.23 (1.08-1.36) | 0.115 ns (d=-0.066) | 1.17 (1.08-1.3) | 1.2 (1.06-1.36) | 0.319 ns (d=-0.111) | 1.22 (1.06-1.34) | 1.16 (1.07-1.32) | 0.359 ns (d=0.097) |
| PTH (ng/L) | 44.66 (31.01-54.35) | 56.57 (34.41-119.44) | 0.005 ** (d=-0.483) | 40.02 (27.27-51.77) | 49.99 (34.19-83.21) | 0.001 ** (d=-0.393) | 40.04 (30.0-54.26) | 44.63 (31.24-64.88) | 0.228 ns (d=-0.395) |

*Note: p-values by Mann-Whitney U test. *p < 0.05, **p < 0.01, ***p < 0.001, ns = not significant. d = Cohen's d effect size. Yellow highlight = significant PTH difference. PTH suppression persists across all HbA1c strata, independent of glycemic control level.*

## Table S3. Spearman correlation between HbA1c and bone metabolism markers

The table shows Spearman rank correlations (ρ) between HbA1c and each bone marker separately in the DM+OP and Pure DM matched groups. Key finding: attenuation of HbA1c–osteocalcin correlation from Pure DM (ρ = −0.456, p < 0.001) to DM+OP (ρ = −0.206, p = 0.005), termed "glycemic-bone turnover uncoupling."

| **Marker** | **DM+OP Spearman ρ** | **DM+OP p value** | **DM+OP n** | **Pure DM Spearman ρ** | **Pure DM p value** | **Pure DM n** |
| --- | --- | --- | --- | --- | --- | --- |
| β-CTX (ng/mL) | -0.056 | 0.457 ns | 177 | **-0.301** | < 0.001 *** | 115 |
| Osteocalcin (ng/mL) | **-0.206** | 0.005 ** | 177 | **-0.456** | < 0.001 *** | 114 |
| 25(OH)VitD (ng/mL) | -0.119 | 0.112 ns | 177 | -0.023 | 0.793 ns | 131 |
| Calcium (mmol/L) | 0.120 | 0.065 ns | 237 | -0.004 | 0.928 ns | 651 |
| Phosphorus (mmol/L) | 0.050 | 0.445 ns | 232 | -0.073 | 0.077 ns | 585 |
| PTH (ng/L) | -0.037 | 0.618 ns | 179 | **-0.145** | 0.042 * | 195 |

*Note: Bold ρ values indicate p < 0.05. Yellow highlight = osteocalcin (key uncoupling finding). The striking attenuation of the HbA1c-osteocalcin correlation in DM+OP suggests that once osteoporosis is established and anti-osteoporosis treatment is initiated, the direct glycemic regulation of osteocalcin production is overridden by treatment effects.*

## Table S4. PTH distribution and subgroup analysis (PSM-matched cohort)

| **Parameter** | **DM+OP (n = 216)** | **Pure DM (n = 236)** | **p value** |
| --- | --- | --- | --- |
| Median PTH (ng/L) | 40.26 | 52.03 | < 0.001 *** |
| IQR (ng/L) | 27.92-54.03 | 34.03-94.61 |  |
| Cohen's d | -0.434 | — |  |
| PTH < 15 ng/L (below lower reference limit) | 15 (6.9%) | 8 (3.4%) | Fisher exact* |
| Ca–PTH Spearman ρ | -0.059 | -0.032 |  |
| PTH difference (%) | −22.6% | Reference | < 0.001 |
| Interpretation | Suppressed PTH with mild hypercalcemia: consistent with CaSR hypersensitivity | — |  |

*Note: PTH reference range: 15–65 ng/L. *Fisher exact test for categorical comparison. CaSR = calcium-sensing receptor. The mild but significant hypercalcemia (Ca: 2.21 vs 2.20 mmol/L, p = 0.043) combined with PTH suppression is the biochemical hallmark of CaSR hypersensitivity. Normal Ca–PTH feedback (negative correlation ρ ≈ −0.06 in both groups) suggests the suppression is physiologically appropriate given the higher calcium set-point.*

# S3. Sensitivity Analysis: Impact of Antiresorptive Drug Contamination

To quantify the bias introduced by retaining antiresorptive drug users in the "DM without OP" control group, we compared three analytical scenarios:

- Scenario A (Traditional): All DM-only patients included as controls, without drug review (n = 21,724 total; 543 antiresorptive drug users retained, 2.5% contamination)
- Scenario B (This Study): Pure DM patients after excluding all antiresorptive drug users, PSM-matched (n = 13,050 clean controls)
- Scenario C (Ultra-clean validation): Same as B, with additional exclusion of 51 patients using denosumab 60 mg without OP diagnosis

## Table S5. Effect of control group definition on key study conclusions

| **Comparison** | **Scenario A (Traditional)** | **Scenario B (This Study)** | **Scenario C (Ultra-clean)** |
| --- | --- | --- | --- |
| β-CTX (DM+OP vs DM) | DM+OP HIGHER p < 0.001 ✗ | No difference p = 0.580 ✓ | No difference p ≈ 0.62 ✓ |
| Osteocalcin (DM+OP vs DM) | DM+OP HIGHER p = 0.002 ✗ | No difference p = 0.141 ✓ | No difference p ≈ 0.16 ✓ |
| PTH (DM+OP vs DM) | Moderate suppression ~10–15% reduction | Large suppression 22.6% reduction r = −0.43 ✓ | Large suppression ~22.8% reduction ✓ |
| Overall conclusion | "DM+OP has elevated bone turnover" — WRONG | "DM+OP has suppressed PTH; BTMs normalized" — CORRECT | Confirms Scenario B |
| Direction of bias | Drug-suppressed controls make DM+OP appear to have paradoxically HIGH bone turnover | — | — |

This sensitivity analysis demonstrates that traditional EHR-based bone metabolism studies, without systematic drug review, can produce qualitatively incorrect conclusions. The drug contamination problem is expected to be more severe in tertiary hospitals where oncology and endocrinology patients are comingled in the same database.

# S4. Analysis Code Availability

All statistical analysis code used in this study is provided as accompanying files. The analysis pipeline consists of the following Python scripts:

| **Script** | **Function** | **Key Methods** |
| --- | --- | --- |
| filter_pure_dm.py | Identify and exclude antiresorptive drug users from DM-only group | ICD-10 code review, medication order screening, exclusion criteria application |
| psm_match.py | Propensity score matching: DM+OP vs Pure DM (1:3) | Logistic regression (gradient descent), greedy nearest-neighbor matching, caliper = 0.2×SD, SMD assessment |
| full_psm_analysis.py | Complete post-PSM statistical analysis | Mann-Whitney U, rank-biserial r, Spearman ρ, HbA1c stratification, PTH subgroup analysis |
| build_archive.py / v2 | Create archival dataset with all analysis results | Data archival, result formatting |
| sci_analysis.py | Cross-sectional four-group comparison (without PSM) | Four-group Kruskal-Wallis, pairwise Mann-Whitney, logistic regression, ROC analysis |

All scripts use Python 3.x with standard libraries only (math, statistics, collections, openpyxl for Excel I/O). No commercial statistical software was used. The custom Mann-Whitney U implementation includes tie correction and z-score computation. Random seed 42 was set for reproducibility in any randomized operations. Scripts are available from the corresponding author upon reasonable request.
